# Supplementary material
Source: MDPI journal article supplement (https://www.mdpi.com/2071-1050/10/6/1689)
Supplement: s1 [file s1]

# Supplementary Material for Modeling water-energy-food nexus to understand trade-offs between energy and agriculture under limited water availability

Junlian Gao <sup>1,2,\*</sup>, Xiangyang Xu <sup>1,2</sup>, Guiying Cao <sup>3</sup>, Yurii M. Ermoliev <sup>3</sup>, Tatiana Y. Ermolieva <sup>3</sup>, and Elena A. Rovenskaya <sup>3,4</sup>

<sup>1</sup> Management School, China University of Mining and Technology (Beijing), Beijing 100083, China; xxy@cumtb.edu.cn

<sup>2</sup> Resources and Environment Policy Research Center, China University of Mining and Technology (Beijing), Beijing 100083, China

<sup>3</sup> International Institute for Applied Systems Analysis, Schlossplatz 1, A-2361 Laxenburg, Austria; Cao@iiasa.ac.at (G.C.); ermoliev@iiasa.ac.at (Y.M.E.); ermol@iiasa.ac.at (T.Y.E.); rovenska@iiasa.ac.at (E.A.R.)

<sup>4</sup> Faculty of Computational Mathematics and Cybernetics, Lomonosov Moscow State University, Leninskie Gory, 1(52), GSP-1, Moscow 119991, Russia

\* Correspondence: gao@iiasa.ac.at; Tel.: +86-152-1057-4472

The supplementary material presents the formal description of the regional spatially-detailed cost-minimizing model for coal and agricultural production planning under scarce natural resources and food, energy, water security targets. The document also includes the description of all parameters calibrated for the model, e.g. the calculation of the area occupied by gangue, as well as the data used in the case study of Shanxi province.

## 1. Water availability across Shanxi Province in 1994-2012

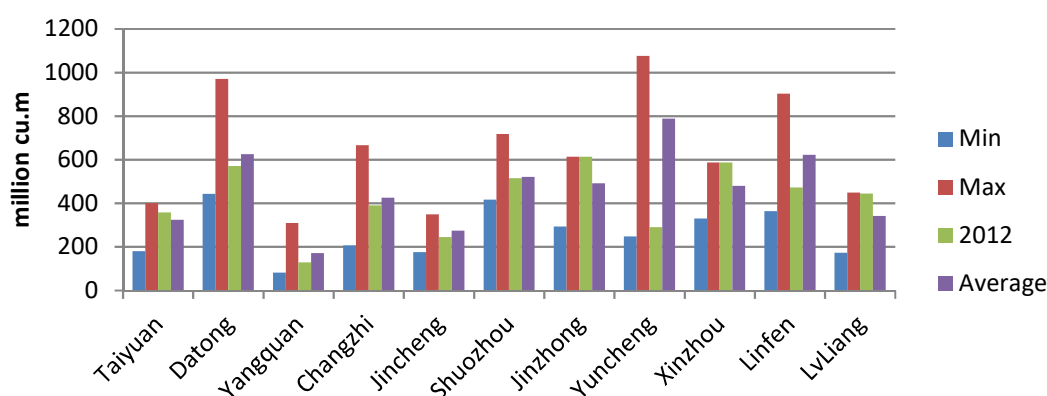

**Figure S1.** The minimum, maximum, the 2012 year, and the average water availability by regions, Shanxi, from 1994 to 2012.

## 2. Technologies profile for the four water availability scenarios in Shuozhou city

**Table S1.** Coal technologies in Shuozhou under four water scenarios unit: Million tons.

| Stages       | Technologies | Scenarios |        |       |        |
|--------------|--------------|-----------|--------|-------|--------|
|              |              | BAUWA     | AWA    | LWA   | HWA    |
| Exploitation | Underground  | 220.00    | 106.82 | 31.22 | 200.00 |
|              | Opencast     | 20.00     | 20.00  | 20.00 | 20.00  |
|              | Total        | 220.00    | 126.82 | 51.22 | 220.00 |
| Processing   | Wet          | 220.00    | 126.82 | 31.22 | 185.60 |

|            |                                       |        |        |       |        |
|------------|---------------------------------------|--------|--------|-------|--------|
|            | Dry                                   | 0.00   | 0.00   | 0.00  | 20.00  |
|            | No Wash                               | 0.00   | 0.00   | 20.00 | 14.40  |
|            | Total                                 | 220.00 | 126.82 | 51.22 | 220.00 |
| Conversion | Electricity_one_through_Subcritical   | 0.00   | 0.00   | 0.00  | 0.00   |
|            | Electricity_one_through_Supercritical | 0.00   | 0.00   | 0.00  | 0.00   |
|            | Electricity_closed_Subcritical        | 0.00   | 0.00   | 0.00  | 0.00   |
|            | Electricity_closed_Supercritical      | 0.00   | 30.86  | 0.00  | 0.00   |
|            | Electricity_closed_IGCC               | 0.00   | 0.00   | 0.00  | 0.00   |
|            | Electricity_air_cooled                | 0.00   | 0.00   | 31.22 | 0.00   |
|            | Electricity_hybrid                    | 0.00   | 0.00   | 0.00  | 0.00   |
|            | Electricity_Total                     | 0.00   | 30.86  | 31.22 | 22.8   |
|            | Coke                                  | 0.00   | 0.00   | 9.26  | 24     |
|            | Gasification                          | 0.00   | 0.00   | 0.00  | 20.00  |
|            | Chemical                              | 0.00   | 0.00   | 0.00  | 0.00   |
|            | Liquefaction                          | 0.00   | 0.00   | 0.00  | 14.40  |
|            | Direct-utilization                    | 1.10   | 1.10   | 1.10  | 1.10   |
|            | Export                                | 218.90 | 94.86  | 8.90  | 157.70 |
|            | Total                                 | 220.00 | 126.82 | 51.22 | 220.00 |

### 3. Detailed mathematical description of the model

#### Indices

The model accounts for various coal mining, processing and conversion technologies, as well as for different types of crops in a number of locations within a region under investigation. We consider the existing technologies as well as those, which are only at the beginning of implementation or even in the research stage, for example, various carbon capturing technologies. Index  $i$  is used to denote the type of coal, which is a combination of the coal class, the extraction (underground room-and pillar or long wall mining, surface strip or auger mining, etc.) and the processing (washing, cleaning, purification, enrichment) technologies, for example, lignite class, longwall mining, and wet washing. By  $t$  we denote a coal conversion technology resulting in end-use product (electricity, coke, heat, gasification and liquefaction). Import and export can also be considered as a way of conversion. Index  $k$  is used to represent different types of crops (corn, wheat, soybean etc.). Index  $d$  defines the end-use product such as electricity, gas, oil, coke, etc.

Indexes  $j$  and  $m$  are used to denote different locations within the case study region. The model can operate at different resolutions. Depending on the chosen resolution, these indices refer to a county, a city, or a smaller geographical unit. In the studies, the analysis is carried out at the spatial resolution of 11 prefectural cities in Shanxi province.

#### Main variables and goal function

In the model, variables  $x_{ijmt}$  denote the amount of coal (in tons) of type  $i$  produced in location  $j$ , transported to location  $m$  and utilized by technology  $t$ . Variables  $y_{kjm}$  denote the amount of crop  $k$  of type (in tons) produced in location  $j$  and exported to location  $m$ . A social planner chooses how much of coal  $i$  and agricultural commodity  $k$  to produce in location  $l$ , so that the total cost of coal and agricultural production, transportation, conversion is minimized and constraints on natural resource utilization, environmental pollution, food security, energy (coal end-product) demand are fulfilled. The goal function is formulated as follows:

$$\min_{x, y} \sum_{i, j, k, m, t} [c_{ij}^{CP} x_{ijmt} + c_{ij}^{CT} x_{ijmt} + c_{ij}^{CC} x_{ijmt} + c_{kj}^{AP} y_{kjm} + c_{kj}^{AT} y_{kjm}] \quad (1)$$

where  $c_{ij}^{CP}$  stands for the production cost of a unit (ton) of coal of type  $i$  in location  $j$ ,  $c_{ijm}^{CT}$  stands for the transportation cost of a unit of coal  $i$  from location  $j$  to location  $m$ ,  $c_{ijt}^{CC}$  defines the conversion costs of a unit of coal  $i$  by technology  $t$  in location  $j$ ,  $c_{kj}^{AP}$  are costs associated with production of a unit (ton) agricultural commodity  $k$  in location  $j$ ,  $c_{kjm}^{AT}$  stands for the transportation cost of a unit of the agricultural commodity  $k$  from location  $j$  to location  $m$ . By  $x$  and  $y$  we mean the sets of all  $x_{ijmt}$  and  $y_{kjm}$  correspondingly.

### Resource and security constraints

#### Land constraints

In China about 40% of the total farmland area overlap with coal reserves. The model incorporates two main farmland disturbances from coal mining - land subsidence and gangue (waste) deposits which is left as a result of separating coal from other materials, both leading to deterioration of land. A number of researches have estimated the land subsidence rate due to coal mining.<sup>2</sup> The character of the subsidence depends on the disposition of mined strata and also on the mining process in place. For example, if backfill mining is applied, the land subsidence can be prevented or controlled as voids are filled with the low-cost solid materials, coming, e.g., from tailings. Using gangue for filling in the voids helps decrease the area occupied with the waste deposits. Subsided land can be recovered by reclamation programs; however it can take long time. Therefore, in our model we divide the farmland into three types: the land used for agriculture, subsided land and the land occupied by the gangue. We impose a land constraint prescribing that the total land used for agriculture, the land which subsides due to coal mining and the land occupied with waste deposits cannot exceed the total farmland in each location. Thus, the constraint is formulated as follows:

$$\sum_{k,m} l_{kj}^A y_{kjm} + \sum_{i,m,t} (1 - r_{ij}) \Delta l_j l_{ij}^S x_{ijmt} + g \sum_{i,m,t} x_{ijmt} \leq L_j \quad (2)$$

where  $l_{kj}^A$  stands for the area of farmland required for production of a unit of crop  $k$  in location  $j$ ,  $l_{ij}^S$  is the area of land that subsides as a result of coal mining of a unit of coal of type  $i$  in location  $j$ ,  $\Delta l_j$  denotes the fraction of the farmland overlapped with the coal filed in the location  $j$ ,  $r_{ij}$  stands for the land reclamation rate (or efficiency rate) for coal  $i$  in location  $j$ . Coefficient  $g$  stands for the coefficient of the gangue<sup>1</sup> occupied area resulting from the production of a unit of coal  $i$  in location  $j$ .  $L_j$  is the farmland constraint in the location  $j$ .

#### Food security constraints

We assume that the region under investigation aims to produce enough food to provide a required amount of calories (nutrition norms) to its population, i.e., ensure the food security. Domestic production can be supplemented by imports depending on the import costs, which can be higher than the costs of domestic production. Thus we impose a constraint on the minimal required level of commodity  $k$  in location  $m$  as follows

$$\sum_j y_{kjm} \geq D_{km}^A \quad (3)$$

where the right-hand side  $D_{km}^A$  defines the demand for agricultural commodity  $k$  in location  $m$ . This constraint requires accounting for transportation costs in the goal function (1) among locations having shortages and overproduction. Note that  $D_{km}^A$  can be measured in terms of the minimum

amount of daily calories per capita suggested by the World Health Organization (WHO) accounting for the size, age, sex, physical activity, climate, and other factors.

#### Energy security constraints

Our model is driven by an exogenous demand for the final energy (electricity) converted from coal. Apart from electricity, the model includes the demand for such end-products of coal as heat, coke, gas, and oil. The demand scenarios at national or subnational levels can come from aggregate models. The conversion efficiency depends on the conversion technologies. Energy security constraint is responsible for fulfilling the demand for the end-products from coal. It is introduced as follows:

$$\sum_{m,t} \alpha_{ijt}^d x_{ijmt} \geq D_j^d \quad (4)$$

where  $\alpha_{ijt}^d$  denotes conversion efficiency of coal type  $i$  in location  $j$  by technology  $t$ , end-products are denoted by  $d$ , and  $D_j^d$  defines the demand for end-use product  $d$ .

#### Water security constraints

Since water plays a key role in coal production and at the same time it is essential for agriculture and for the daily use of regional residents, we impose a constraint on the total water consumed by coal extraction, processing and conversion as well as by the crops irrigation in each location  $j$ :

$$\sum_{i,m,t} w_{ij}^P x_{imlt} + \sum_{i,m,t} w_{ij}^d x_{ijmt} + \sum_{k,m} w_{kj}^c y_{kmj} \leq W_j \quad (5)$$

where  $w_{ij}^P$  defines the amount of water required to produce a unit of coal  $i$  in location  $j$ ,  $w_{ij}^d$  is the amount of water required to convert a unit of coal  $i$  in location  $j$ ,  $w_{kj}^c$  is the amount of water required to irrigate a unit of crop  $k$  in location  $j$ , and  $W_j$  defines the water availability for the industry and agriculture sectors in location  $j$ . Note that constraints on water use could also be introduced in the model separately for coal production (mining) and coal conversion.

#### Environmental Security

The environmental security considerations are introduced in the model in the form of emissions constraints, in particular, on the emissions from coal conversion, of which SO<sub>2</sub> and CO<sub>2</sub> are the most important pollutants. In the model we include technologies, which are able to reduce SO<sub>2</sub> and CO<sub>2</sub> emissions, however, at the cost of some additional water consumption.

The coal-based power plants are the main source of SO<sub>2</sub> emission in China, as SO<sub>2</sub> is generated during the combustion of coal.<sup>3</sup> In the future, due to the air emission standards coming into force, both new and existing coal-based plants will be required to install a Flue Gas Desulfurization (FGD) system in China. A wide range of commercial FGD processes are available to remove SO<sub>2</sub> from the flue gas. By far, wet scrubbing system is the most common one with 80% of the global installed capacity. However the FGD systems require a lot of water and their introduction will increase water needs for coal-based power plants too.<sup>4</sup> Thus, we impose a SO<sub>2</sub> emission constraint associated with the coal conversion in location  $j$ , which sets up an upper limit for SO<sub>2</sub> to be emitted in the location as follows:

$$\sum_{i,m,t} e_{ijt}^{SO_2,d} x_{ijmt} \leq E_j^{SO_2} \quad (6)$$

where  $e_{ijt}^{SO_2,d}$  is the SO<sub>2</sub> emission rate from coal  $i$  in location  $j$  by technology  $t$  converted into the end-use product  $d$ ;  $E_j^{SO_2}$  defines SO<sub>2</sub> emission cap in location  $j$ .

Apart from SO<sub>2</sub>, coal-based power plants are the largest contributors to the atmospheric CO<sub>2</sub> concentrations. According to the IEA estimates, CO<sub>2</sub> resulting from coal-based power plants accounts for 45% of the total GHG emissions from fossil energy in China.<sup>5</sup> In order to decrease CO<sub>2</sub>, China needs to considerably reduce the coal demand and supplement coal mining with carbon capture and storage (CCS) technologies. The timing and rate of this process will depend on the stringency of the near-term climate policy and will have important implications for the stranding of coal power plant capacity without CCS. <sup>6</sup>China will require commercial deployment of the CCS technology to begin in the next few years. The importance of CCS is expected to grow between 2020 and 2030.<sup>7</sup> However the CCS systems require additional cooling involving water. Introduction of the CCS systems, such as the wet cooling tower, doubles the water use at coal-based plants.<sup>8</sup> Given that, the water pressure in coal-producing regions in China is expected to become even stronger. In our model we impose a CO<sub>2</sub> emission constraint associated with the coal conversion by setting an upper limit for the CO<sub>2</sub> emissions as follows:

$$\sum_{i,m,t} e_{ijt}^{CO_2,d} x_{ijmt} \leq E_j^{CO_2} \quad (7)$$

where  $e_{ijt}^{CO_2,d}$  is CO<sub>2</sub> emission rate from conversion of coal  $i$  in location  $j$  by technology  $t$  converted into the end-use product  $d$ ;  $E_j^{CO_2}$  defines CO<sub>2</sub> emission cap in location  $j$ .

#### *Coal productive capacity*

The amount of coal produced in each location is constrained by the coal productive capacity of that location. Coal productive capacity is the maximum amount of coal that can be produced annually depending on geological conditions, mining technology and equipment. According to the Regulation of State Safety Work Administration, for the sake of safety, mining companies are forbidden to produce above the productive capacity which is registered in coal production license.<sup>9</sup> We impose the following constraint

$$\sum_{i,m,t} x_{ijmt} \leq C_j^c \quad (8)$$

where  $C_j^c$  stands for the coal productive capacity in location  $j$ .

#### *Coal purification and enrichment processes: dry and wet cleaning*

Washing coal is a promising way of increasing its efficiency and utilization – it increases the coal quality as well as serves environmental protection. Washing helps remove the waste materials from coal. Also it makes the transportation cost lower. In China, the washing rate of raw coal is relatively low compared with, for example, the one in the USA and Australia. However, recently the Government has acknowledged the importance of washing coal in the energy development 12<sup>th</sup> Five-year Plan requiring the washing rate to increase up to 65% by 2015. In our model we impose a limit for the washing rate in each location  $j$  as follows

$$\sum_{m,t} x_{ojmt} \leq w \sum_{i,m,t} x_{ijmt} \quad (9)$$

where  $w$  is the washing rate of raw coal, and index  $o$  represents the type of coal without washing.

## 4. Model Calibration

We calibrate the model using relevant data from the year 2012. In the case study, we distinguish 11 major coal and crop production locations corresponding to the prefecture-level cities, i.e. Taiyuan, Datong, Changzhi, Jincheng, Jinzhong, Linfen, Lüliang, Shuozhou, Xinzhou, Yangquan, and Yuncheng.

In 2012, there was no absolute value control on GHG, as well as sulfur dioxide, nitrogen oxides in Shanxi, therefore in 2012 we assume no constraints on emissions.

Agricultural land use is constraint by the available farmland in each location in 2012.

### Calculation of the Area Occupied by Gangue

In processing of coal, gangue comes from two stages of the process. On the stage of coal mining, gangue is extracted together with coal and is called extraction gangue. In Shanxi, the rate of extraction gangue ( $EG_e$ ) is 10%-15% of the coal production. On the second stage, gangue comes from coal preparation. The rate of coal preparation gangue ( $EG_p$ ) is 15%-20% of the coal <sup>10</sup>According to the 12<sup>th</sup> Five-year Plan of the coal industry development, the rate of coal preparation gangue ( $R_p$ ) should be about 65% of the processed coal at the end of 2015. The gangue output,  $GP_{ijt}$  in location  $j$  from coal of type  $i$  and technology  $t$  is calculated as follows

$$GP_{ijt} = \sum_m x_{ijmt} (1 - R_p) EG_e + x_{ijmt} R_p EG_p = \sum_m x_{ijmt} (1 - 65\%) EG_e + x_{ijmt} 65\% 15\% = \sum_m 0.1325 x_{ijmt} \quad (10)$$

In 2010, the rate of gangue utilization was about 61.4%. <sup>11</sup>The area occupied by the gangue pile ( $GL$ ) is calculated as  $GL = \left( \frac{1}{\tan B * \tan P} + \frac{3.14}{\tan^2 P} \right) H^2$ , where  $H$  is the height of the gangue pile,

which can be calculated as  $H = \sqrt[3]{\frac{6 \tan^2 P * \tan B}{2 \tan P + 3.14 \tan B} * V}$ ,  $V$  is the volume of the gangue pile,  $B$  is the angle of the waste dump, the value is  $16^\circ$ . <sup>11</sup> $P$  is the repose angle of the waste dump with the value of  $40^\circ$ , the coefficient of  $1.6t/m^3$

$$GP_{ijt} = \left( \frac{1}{\tan B * \tan P} + \frac{3.14}{\tan^2 P} \right) \left( \sqrt[3]{\frac{6 \tan^2 P * \tan B}{2 \tan P + 3.14 \tan B} * \frac{GL_{ijt}}{1.6}} \right)^2 = 3.67 * 10^{-4} (GL_{ijt})^2 \quad (11)$$

We assume the average weight of a gangue pile is about 100t, the coefficient of occupied area from the gangue is 0.0367 which is close to the field data 0.04 in Shanxi. <sup>11</sup> Finally, the coefficient of the area occupied by coal is calculated as  $0.0367 * 0.1325 \approx 0.0049$

### Data for Shanxi Province.

Table S2 is the data of the sown area of the crops in Shanxi, which is used for  $L_j$  in formula (2). <sup>12</sup> Table S3 is the yields of the crops in Shanxi. <sup>13</sup> The data in Table S1 divided by the data in Table S2, we get the data for  $l_{kj}^A$  in formula (2). Table S4 is the data of water availability in each city. <sup>13</sup> Table S5 is the data of proportion of water withdrawals by industry and agriculture sectors over the total water availability in 2012. <sup>13</sup> We get  $W_j$  in formula (5) by multiply the data from Table S4 and Table S5. Table S6 is the data of coal production in Shanxi, which is used for  $C_j^c$  in formula (8). <sup>13</sup> Table S7 is the data of the coal field area in Shanxi, which used for  $l_{ij}^S$  in formula (2). <sup>13</sup> Table S8 is the data of water withdrawals of different technologies in the coal industry, which is used for  $w_{ij}^P$  and  $w_{ij}^d$  in formula (5). <sup>14-20</sup> Table S9 is the data of Water withdrawals by crops in Shanxi, which is used for  $w_{kj}^c$  in formula (5). <sup>21-23</sup> Table S10 is the data of distance between major cities in Shanxi, which used for  $c_{ijm}^{CT}$  and  $c_{kjm}^{AT}$  in the formula (1). <sup>13</sup> Table S11 is the data of efficiency of conversion technologies, which is used for  $\alpha_{ijt}^d$  in formula (4). <sup>13</sup> Table S12 is the data of demand for coal end-use products energy, which is used for  $D_j^d$  in the formula (4). <sup>13</sup> Table S13 is the data of demand for crops, which is used for  $D_{km}^A$  in formula(3). <sup>13</sup> The washing rate of raw coal is not lower than 60%, the target is set as of 2012 year, which is use for  $w$  in formula 10.

**Table S2.** Sown area of major farm crops in Shanxi (2012) unit: km<sup>2</sup>

|          | Wheat | Corn  | Millet | Sorghum | Oats | Buckwheat | Bean | Potato |
|----------|-------|-------|--------|---------|------|-----------|------|--------|
| Taiyuan  | 8     | 555   | 64     | 13      | 6    | 13        | 46   | 70     |
| Datong   | 0     | 1,619 | 180    | 20      | 89   | 54        | 124  | 274    |
| Yangquan | 1     | 478   | 45     | 0       | 0    | 0         | 8    | 19     |
| Changzhi | 142   | 2,045 | 127    | 13      | 3    | 3         | 59   | 103    |
| Jincheng | 617   | 855   | 77     | 4       | 0    | 0         | 374  | 27     |
| Shuozhou | 1     | 1,447 | 80     | 17      | 141  | 128       | 107  | 328    |
| Jinzhong | 202   | 2,101 | 129    | 31      | 1    | 15        | 182  | 68     |
| Yuncheng | 3,434 | 2,758 | 14     | 9       | 0    | 0         | 128  | 3      |
| Xinzhou  | 2     | 2,475 | 279    | 17      | 193  | 4         | 243  | 521    |
| Lingfen  | 2,357 | 2,136 | 163    | 9       | 3    | 8         | 116  | 69     |
| Lvliang  | 71    | 1,609 | 382    | 63      | 32   | 13        | 531  | 450    |

**Table S3.** Output of major farm crops in Shanxi (2012) unit: ton.

|          | Wheat     | Corn      | Millet | Sorghum | Oats   | Buckwheat | bean   | Potato  |
|----------|-----------|-----------|--------|---------|--------|-----------|--------|---------|
| Taiyuan  | 4,650     | 213,782   | 9,565  | 7,184   | 600    | 1,709     | 5,705  | 9,674   |
| Datong   | 0         | 754,508   | 35,075 | 6,277   | 9,035  | 6,425     | 13,900 | 59,210  |
| Yangquan | 615       | 261,148   | 9,759  | 6       | 0      | 4         | 1,470  | 4,753   |
| Changzhi | 51,920    | 1,123,154 | 41,091 | 6,591   | 209    | 220       | 11,856 | 43,832  |
| Jincheng | 201,481   | 568,509   | 27,543 | 1,936   | 0      | 0         | 77,130 | 14,053  |
| Shuozhou | 424       | 870,431   | 19,254 | 5,300   | 14,304 | 12,431    | 9,970  | 73,160  |
| Jinzhong | 81,534    | 1,183,707 | 35,032 | 15,214  | 156    | 1,449     | 34,499 | 21,830  |
| Yuncheng | 1,041,930 | 1,208,948 | 3,084  | 3,387   | 0      | 0         | 11,619 | 1,690   |
| Xinzhou  | 869       | 1,261,526 | 78,676 | 7,253   | 33,107 | 615       | 36,075 | 143,764 |
| Lingfen  | 733,160   | 1,108,236 | 43,331 | 2,811   | 549    | 889       | 18,633 | 21,431  |
| Lvliang  | 29,828    | 785,441   | 78,476 | 16,637  | 2,454  | 1,672     | 58,548 | 83,461  |

**Table S4.** Water availability in each city from 1994 to 2012 unit: million m<sup>3</sup>.

|      | Taiyuan | Datong | Yangquan | Changzhi | Jincheng | Shuozhou | Jinzhong | Yuncheng | Xinzhou | Lingfen | Lvliang |
|------|---------|--------|----------|----------|----------|----------|----------|----------|---------|---------|---------|
| 2012 | 505     | 674    | 379      | 1,176    | 1,127    | 570      | 1,341    | 728      | 1,822   | 979     | 1,325   |
| 2011 | 552     | 546    | 356      | 1,220    | 1,373    | 476      | 1,242    | 2,600    | 1,626   | 1,241   | 1,202   |
| 2010 | 354     | 668    | 314      | 884      | 913      | 510      | 917      | 1,296    | 1,507   | 756     | 1,037   |
| 2009 | 433     | 551    | 320      | 731      | 808      | 460      | 930      | 1,116    | 1,413   | 814     | 999     |
| 2008 | 373     | 651    | 279      | 872      | 840      | 553      | 823      | 953      | 1,651   | 835     | 909     |
| 2007 | 400     | 586    | 299      | 1,396    | 1,056    | 561      | 1,085    | 1,141    | 1,626   | 1,112   | 1,074   |
| 2006 | 360     | 577    | 312      | 1,011    | 971      | 477      | 851      | 1,246    | 1,202   | 1,070   | 775     |
| 2005 | 269     | 670    | 238      | 1,048    | 986      | 508      | 847      | 932      | 1,181   | 939     | 794     |
| 2004 | 253     | 777    | 278      | 1,092    | 943      | 534      | 896      | 1,060    | 1,368   | 1,056   | 989     |
| 2003 | 405     | 741    | 284      | 2,005    | 1,464    | 604      | 1,090    | 2,694    | 1,370   | 1,874   | 955     |
| 2002 | 362     | 522    | 351      | 743      | 867      | 518      | 643      | 620      | 1,027   | 785     | 513     |
| 2001 | 362     | 522    | 351      | 743      | 867      | 518      | 643      | 620      | 1,027   | 785     | 513     |
| 2000 | 389     | 602    | 411      | 736      | 1,029    | 546      | 709      | 968      | 1,225   | 829     | 705     |
| 1999 | 351     | 575    | 446      | 620      | 855      | 535      | 805      | 995      | 1,096   | 824     | 560     |
| 1998 | 361     | 700    | 376      | 739      | 1,309    | 574      | 732      | 1,552    | 1,482   | 1,161   | 722     |
| 1997 | 564     | 870    | 909      | 1,373    | 1,611    | 767      | 749      | 653      | 1,088   | 855     | 1,336   |
| 1996 | 502     | 1,083  | 680      | 865      | 1,302    | 792      | 1,326    | 953      | 1,164   | 976     | 1,195   |
| 1995 | 405     | 1,144  | 586      | 760      | 1,092    | 786      | 795      | 1,185    | 1,557   | 1,145   | 1,136   |
| 1994 | 343     | 678    | 474      | 621      | 1,100    | 620      | 680      | 1,295    | 1,253   | 1,215   | 939     |

**Table S5.** Proportion of water withdrawals by industry and agriculture sectors over the total water availability in 2012 Unit: %.

| Taiyuan | Datong | Yangquan | Changzhi | Jincheng | Shuozhou | Jinzhong | Yuncheng | Xinzhou | Lingfen | Lvliang |
|---------|--------|----------|----------|----------|----------|----------|----------|---------|---------|---------|
| 77.60   | 68.75  | 32.06    | 34.46    | 26.41    | 75.64    | 42.32    | 142.71   | 28.71   | 61.06   | 30.47   |

**Table S6.** Coal productive capacity in Shanxi (2012) ( $C_j^c$ ) Unit: ton.

| Taiyuan    | Datong      | Yangquan   | Changzhi    | Jincheng   | Shuozhou    | Jinzhou    | Yuncheng | Xinzhou    | Lingfeng   | Lvliang     |
|------------|-------------|------------|-------------|------------|-------------|------------|----------|------------|------------|-------------|
| 34,965,800 | 105,630,900 | 60,937,500 | 116,621,400 | 84,411,300 | 210,800,000 | 80,214,100 | 4,922    | 53,574,500 | 47,573,400 | 118,178,500 |

**Table S7.** Area of coal field in Shanxi ( $l_{ij}^s$ ) Unit: km<sup>2</sup>.

| Taiyuan | Datong | Yangquan | Changzhi | Jincheng | Shuozhou | Jinzhou | Yuncheng | Xinzhou | Lingfeng | Lvliang |
|---------|--------|----------|----------|----------|----------|---------|----------|---------|----------|---------|
| 1,368   | 632    | 1,484    | 8,500    | 5,350    | 1,603    | 13,000  | 1,450    | 4,386   | 15,400   | 10,640  |

**Table S8.** Water withdrawals (water needed for production of a unit of coal) by technology ( $w_{ij}^p$ ).

| Mining                                   | m3/ton    | Conversion              |
|------------------------------------------|-----------|-------------------------|
| Long wall                                | 0.25~0.30 | Generic                 |
| Opencast                                 | 0.02      | Tower-Subcritical       |
| Backfilling                              | 0.25~0.30 | Tower-supercritical     |
| Underground gasification                 | 0.25~0.30 | Tower-igcc              |
| <b>Processing</b>                        | m3/ton    | Tower-subcritical-ccs   |
| Wetting clearing_dense medium separation | 0.1       | Tower-supercritical-ccs |
| Wetting clearing_water circuit           | 0.1       | Tower-igcc-ccs          |
| Wetting clearing_coal floatation         | 0.1       | One-generic             |
| Dry clearing                             | 0         | One-subcritical         |
|                                          |           | One-supercritical       |
|                                          |           | Pond-generic            |
|                                          |           | Pond-subcritical        |
|                                          |           | Pond-supercritical      |
|                                          |           | Coke                    |
|                                          |           | Gasification            |
|                                          |           | Liquefaction            |
|                                          |           | Chemical                |

IGCC: Integrated gasification combined cycle; CCS: Carbon capture and sequestration; One: Once through

**Table S9.** Water withdrawals (water needed for production of a unit of crops) by crops in Shanxi ( $w_{km}^c$ ) unit: m3/t.

|           | Taiyuan | Datong | Yangquan | Jinzhou | Xinzhou | Shuozhou | Jincheng | Lvliang | Changzhi | Lingfeng | Yuncheng |
|-----------|---------|--------|----------|---------|---------|----------|----------|---------|----------|----------|----------|
| Wheat     | 498     | 523    | 541      | 1,007   | 838     | 691      | 631      | 638     | 988      | 688      | 1,268    |
| Corn      | 395     | 621    | 357      | 226     | 237     | 481      | 276      | 379     | 568      | 373      | 633      |
| Millet    | 1,340   | 946    | 932      | 440     | 397     | 765      | 738      | 645     | 717      | 537      | 987      |
| Sorghum   | 726     | 1,292  | 1,790    | 786     | 835     | 1,297    | 832      | 1,027   | 955      | 1,343    | 1,535    |
| Oats      | 5,032   | 4,682  | 5,320    | 6,320   | 6,455   | 4,665    | 3,138    | 5,455   | 2,760    | 2,860    | 5,179    |
| Buckwheat | 3,507   | 3,806  | 5,996    | 5,489   | 4,544   | 4,541    | 4,541    | 3,463   | 3,274    | 3,870    | 3,547    |
| bean      | 1,585   | 1,522  | 1,088    | 374     | 364     | 1,826    | 1,047    | 876     | 1,143    | 1,057    | 1,794    |
| Potato    | 152     | 146    | 82       | 64      | 52      | 141      | 65       | 41      | 114      | 67       | 170      |



**Table S10.** Distance between major cities in Shanxi unit: km.

|          | Taiyuan | Datong | Yangquan | Changzhi | Jincheng | Shuozhou | Jinzhong | Yuncheng | Xinzhou | Lingfen | Lvliang |
|----------|---------|--------|----------|----------|----------|----------|----------|----------|---------|---------|---------|
| Taiyuan  | 0       | 273    | 111      | 223      | 304      | 207      | 42       | 383      | 71      | 247     | 183     |
| Datong   | 273     | 0      | 664      | 498      | 580      | 134      | 304      | 667      | 208     | 528     | 460     |
| Yangquan | 111     | 664    | 0        | 287      | 368      | 305      | 102      | 473      | 173     | 343     | 276     |
| Changzhi | 223     | 498    | 287      | 0        | 100      | 438      | 200      | 350      | 306     | 315     | 308     |
| Jincheng | 304     | 580    | 368      | 100      | 0        | 520      | 282      | 257      | 388     | 221     | 391     |
| Shuozhou | 207     | 134    | 305      | 438      | 520      | 0        | 240      | 603      | 144     | 474     | 395     |
| Jinzhong | 42      | 304    | 102      | 200      | 282      | 240      | 0        | 387      | 109     | 257     | 213     |
| Yuncheng | 383     | 667    | 473      | 350      | 257      | 603      | 387      | 0        | 472     | 144     | 368     |
| Xinzhou  | 71      | 208    | 173      | 306      | 388      | 144      | 109      | 472      | 0       | 342     | 266     |
| Lingfen  | 247     | 528    | 343      | 315      | 221      | 474      | 257      | 144      | 342     | 0       | 263     |
| Lvliang  | 183     | 460    | 276      | 308      | 391      | 395      | 213      | 368      | 266     | 263     | 0       |

**Table S11.** Efficiency of conversion technologies ( $\alpha_{ijt}^d$ ).

| Technology | One through | Closed  | Air cooled | Hybrid  | Gasification | coke    | liquefaction | chemical | trans   |
|------------|-------------|---------|------------|---------|--------------|---------|--------------|----------|---------|
| Value      | 0.33        | 0.35    | 0.36       | 0.36    | 0.00         | 1.30    | 4.00         | 2.00     | 1.00    |
| Unit       | ton/Mwh     | ton/Mwh | ton/Mwh    | ton/Mwh | ton/m3       | ton/ton | ton/ton      | ton/ton  | ton/ton |

**Table S12.** Demand for coal end-use products energy ( $D_j^d$ ).

| Products | Coke       | Electricity | Gas           | Oil       | Chemical  |
|----------|------------|-------------|---------------|-----------|-----------|
| Value    | 56,000,000 | 230,173,000 | 8,000,000,000 | 3,600,000 | 4,400,000 |
| Unit     | ton        | Mwh         | m3            | ton       | ton       |

**Table S13.** Demand for crops ( $D_{km}^A$ ) unit: ton.

| Wheat     | Corn      | Millet  | Sorghum | Oats   | Buckwheat | bean    | Potato  |
|-----------|-----------|---------|---------|--------|-----------|---------|---------|
| 2,146,000 | 9,300,000 | 380,000 | 70,000  | 60,000 | 25,000    | 280,000 | 480,000 |

**Table S14.** Water constraints and consumption data.

| City     | Water constraints | Water consumption in reality | Water consumption in model |
|----------|-------------------|------------------------------|----------------------------|
| Taiyuan  | 391,883,519       | 137,666,992                  | 248,031,975                |
| Datong   | 463,383,212       | 474,896,387                  | 463,383,212                |
| Yangquan | 121,507,803       | 68,456,393                   | 72,205,810                 |
| Changzhi | 405,285,811       | 408,228,806                  | 405,285,811                |
| Jincheng | 297,587,001       | 300,892,997                  | 297,587,001                |
| Shuozhou | 431,146,052       | 410,043,084                  | 420,988,760                |
| Jinzhong | 567,476,918       | 576,640,819                  | 567,476,918                |
| Yuncheng | 1,038,932,506     | 763,151,356                  | 810,936,918                |
| Xinzhou  | 523,111,241       | 519,232,299                  | 460,194,767                |
| Lingfen  | 597,782,433       | 579,034,404                  | 526,094,745                |
| Lvliang  | 403,695,082       | 354,003,013                  | 318,419,073                |

**Table S15** The land requirement for each crop in sub regions unit : km<sup>2</sup>/ton.

|          | Wheat    | Corn     | Millet   | Sorghum  | Oats     | Buckwheat | bean     | Potato   |
|----------|----------|----------|----------|----------|----------|-----------|----------|----------|
| Taiyuan  | 0. 00174 | 0. 00203 | 0. 00670 | 0. 00180 | 0. 01062 | 0. 00779  | 0. 00799 | 0. 00728 |
| Datong   | 0. 00133 | 0. 00215 | 0. 00513 | 0. 00320 | 0. 00988 | 0. 00846  | 0. 00896 | 0. 00462 |
| Yangquan | 0. 00189 | 0. 00183 | 0. 00466 | 0. 00444 | 0. 01369 | 0. 01333  | 0. 00550 | 0. 00393 |
| Changzhi | 0. 00273 | 0. 00144 | 0. 00309 | 0. 00195 | 0. 01333 | 0. 01220  | 0. 00499 | 0. 00236 |
| Jincheng | 0. 00227 | 0. 00150 | 0. 00278 | 0. 00207 | 0. 01416 | 0. 01015  | 0. 00485 | 0. 00194 |
| Shuozhou | 0. 00173 | 0. 00166 | 0. 00415 | 0. 00322 | 0. 00984 | 0. 01009  | 0. 01074 | 0. 00448 |
| Jinzhong | 0. 00220 | 0. 00142 | 0. 00369 | 0. 00206 | 0. 00662 | 0. 01009  | 0. 00529 | 0. 00311 |
| Yuncheng | 0. 00223 | 0. 00196 | 0. 00452 | 0. 00255 | 0. 00817 | 0. 00000  | 0. 01103 | 0. 00196 |
| Xinzhou  | 0. 00247 | 0. 00196 | 0. 00389 | 0. 00237 | 0. 00582 | 0. 00728  | 0. 00672 | 0. 00363 |
| Lingfen  | 0. 00240 | 0. 00193 | 0. 00377 | 0. 00333 | 0. 00603 | 0. 00860  | 0. 00622 | 0. 00321 |
| Lvliang  | 0. 00239 | 0. 00205 | 0. 00493 | 0. 00381 | 0. 01093 | 0. 00788  | 0. 00906 | 0. 00539 |

Table S16 The list of the constraints and data in the case study.

| Constraints | Water availability in each sub region | Land availability in each sub region | Demand of the end use energy in the province | Demand of coal in the province | Demand of the crop in the province | The coal production capacity in each sub region | the wash rate of the coal |
|-------------|---------------------------------------|--------------------------------------|----------------------------------------------|--------------------------------|------------------------------------|-------------------------------------------------|---------------------------|
| Data        | Table S4, S5                          | Table S2                             | Tale S12                                     | 913 million tons               | Tale S14                           | Tale S6                                         | 0.6                       |

- (1) Xu, H., Liu, B., Fang, Z.. New grey prediction model and its application in forecasting land subsidence in coal mine. *Natural Hazards*, **2014**, 71(2), 1181-1194.
- (2) Donnelly, L. J., De La Cruz, H., Asmar, I., Zapata, O., & Perez, J. D. (). The monitoring and prediction of mining subsidence in the Amaga, Angelopolis, Venecia and Bolombolo Regions, Antioquia, Colombia. *Engineering Geology*, **2001**, 59(1), 103-114.
- (3) Xu, Y., Xue, J., Guan, Y., Wang H., Liu, T. Control strategy for sulfur dioxide under new standard in coal—fired power plant. *Electric Power*, **2012**, 45(4), 73-78
- (4) Carpenter A. Water-Saving FGD technologies. *Conerstone*, **2014**, 58-63.
- (5) Greenhouse gas emissions management seminar. People' Daily. [www.paper.people.com.cn/rmrhwb/html/2012-05/30/content\\_1059041.htm?div=-1](http://www.paper.people.com.cn/rmrhwb/html/2012-05/30/content_1059041.htm?div=-1). In Chinese
- (6) Johnson, N., Krey, V., McCollum, D. L., Rao, S., Riahi, K., Rogelj, J. Stranded on a low-carbon planet: implications of climate policy for the phase-out of coal-based power plants. *Technological Forecasting and Social Change*, **2015**, 90, 89-102.
- (7) CCS in China: toward an environmental, health, and safety regulatory framework. [www.pdf.wri.org/ccs\\_in\\_china.pdf](http://www.pdf.wri.org/ccs_in_china.pdf)
- (8) Zhai, H., & Rubina, E. S. Carbon capture effects on water use at pulverized coal power plants. *Energy Procedia*, **2011**, 4, 2238-2244.
- (9) Notification on coal production capacity of management practices and approved standard. [www.chinasafety.gov.cn/newpage/Contents/Channel\\_5330/2014/0716/237581/content\\_237581.htm](http://www.chinasafety.gov.cn/newpage/Contents/Channel_5330/2014/0716/237581/content_237581.htm)
- (10) Liu H., Ma C., Zhang H. Analysis and utilization research on the gangue in Pingdingshan coal area. *Shandong Coal Technology*, **2008** (2) :117-118. In Chinese
- (11) Liu C., Fan W., Wang R. Advices and situation of the gangue utilization in Shanxi. *Energy Saving*, **2012**(12):4-7. In Chinese
- (12) Shanxi Bureau of Statistics. Shanxi Statistical Yearbook 2013. China Statistical Press, Beijing, 2014
- (13) China Coal Industry Associate Website; <http://www.coalchina.org.cn/page/info.jsp?id=103561>
- (14) Energy demands on water resources; U.S. Department of Energy. Washington, DC, 2006; [http://www.sandia.gov/energy-water/docs/121-RptToCongress-EWwEIA comm ents-FINAL.pdf](http://www.sandia.gov/energy-water/docs/121-RptToCongress-EWwEIA%20comm%20ents-FINAL.pdf)
- (15) Meldrum, J., Nettles-Anderson, S., Heath, G., Macknick, J. Life cycle water use for electricity generation: A review and harmonization of literature estimates. *Environmental Research Letters*. **2013**. 8(1), 015031.
- (16) Mielke, E., Anadon, L. D., Narayanamurti, V. Water consumption of energy resource extraction, processing, and conversion. *Energy Technology Innovation Policy Discussion Paper*, **2010**, 15, 5-6.
- (17) Macknick, J., Newmark, R., Heath, G., & Hallett, K. C. A review of operational water consumption and withdrawal factors for electricity generating technologies. *Contract*, **2011**, 303, 275-3000.
- (18) Byers, E. A., Hall, J. W., Amezcaga, J. M. Electricity generation and cooling water use: UK pathways to 2050. *Global Environmental Change*, **2014**, 25, 16-30.
- (19) Pan, L., Liu, P., Ma, L., & Li, Z. A supply chain based assessment of water issues in the coal industry in China. *Energy Policy*, **2012**. 48, 93-102.
- (20) Shanxi Provincial Government Website; <http://www.shanxigov.cn/n16/n1203/n1866/n5130/n31265/1010341.html>
- (21) Yang, L. Research on the quota of irrigation in Shanxi. *Yellow River*, **2011**. 33(5):74-77. In Chinese.
- (22) Wang, R. Research on the establishment of quota of irrigation in Shanxi. *Yellow River*, **2011**. 33(6):97-100. In Chinese.
- (23) Hu M, Wang R., Liu Y. Research on adjustment for the quota of irrigation in Shanxi. *Yellow River*, **2011**. 33(8):74-77. In Chinese.
